# Supplementary material for: The Impact of the COVID-19 Lockdown “Home Quarantine” on the Physical Activity and Lifestyle of Children in Qatar
Source: Frontiers journal article supplement (doi:10.3389/fpubh.2022.877424), 2022-05-25
Supplement: Data_Sheet_1.PDF [file Data_Sheet_1.PDF]

## Questionnaire: English Version

1. Age of child (years):
2. Gender of child:
  - Male
  - Female
3. Nationality of child:
4. Current weight of the child (kg):
5. Current height of the child (cm):
6. Relationship of caregiver to child:
  - Mother
  - Father
  - Nanny
  - other (please state the relationship)
7. Rank the child among siblings:
  - Oldest
  - Middle
  - Youngest
8. Age of caregiver:
  - <20
  - 20-29
  - 30-39
  - 40-49
  - >= 50
9. Level of education of caregiver
  - No schooling
  - Primary School
  - Middle School
  - High School
  - Bachelors
  - Masters
  - PhD /Other
10. Select the child's physical activity level before quarantine versus during quarantine (this includes play, games, sports, and planned exercises):

### **Before Quarantine:**

- Very High (more than 7 hours per week)
- High (between 5 and 7 hours per week)

- Moderate (between 2 and 4 hours per week)
- Minimal (less than 2 hours)
- None (0 hours)

**During Quarantine:**

- Very High (more than 7 hours per week)
- High (between 5 and 7 hours per week)
- Moderate (between 2 and 4 hours per week)
- Minimal (less than 2 hours)
- None (0 hours)

11. On average, how many hours per week did the child do **physical activity** before quarantine versus during quarantine?

**Before Quarantine:**

- Activity at school during regular hour:
- Activity after school:
- Extra Activity at home:

**During Quarantine:**

- Online Activity organized by school
- Online Activity after school
- Extra Activity at home

12. Which factors decreased the child's physical activity during quarantine? (Choose all that apply)

- Limited space at home
- Limited equipment
- Child doesn't enjoy it
- Child is alone
- Playgrounds and parks are closed
- Increase in child screen time for school (computers, tablets etc....)
- Increase in child screen time for fun (TV, computers, video games etc....)
- Fear of COVID-19
- Other factors please specify?

13. Which factors increased the child's physical activity during quarantine? (Choose all that apply)

- More time at home
- Encouragement

- Child enjoys activity with family
- Variation between outdoor and indoor activities
- Introduced new activities at home
- I rewarded the child after an activity
- I educated the child (e.g. discussed health benefits)
- Constantly changed exercise plan
- Other factors please specify?

14. On a typical day, how many hours per day does the child spend on screen time for fun activities (e.g. TV, videos, computer, video-games, smartphone, tablet)?

• **Screen Time Before Quarantine (hours/day):**

- 0
- >0 – 1 hour
- >2 – 3 hours
- >3 – 4 hours
- >4 – 5 hours
- >5 – 6 hours
- >6 – 7 hours
- >7 – 8 hours
- >8 hours

• **Screen Time During Quarantine (hours/day):**

- 0
- >0 – 1 hour
- >2 – 3 hours
- >3 – 4 hours
- >4 – 5 hours
- >5 – 6 hours
- >6 – 7 hours
- >7 – 8 hours
- >8 hours

15. How many main meals per day did the child consume before quarantine and during quarantine?

- Before Quarantine (meals/day):
- During Quarantine (meals/day):

16. Select the amount of unhealthy food (like fast food, soft drinks, sweets etc) the child consumed before quarantine and during quarantine:

**Before Quarantine**

- Never
- Once per week

- 2 to 4 days per week
- 5 to 6 days per week
- Everyday
- More than once a day

**During Quarantine**

- Never
- Once per week
- 2 to 4 days per week
- 5 to 6 days per week
- Everyday
- More than once a day

17. Select the amount of healthy food (like vegetables, fruit, whole grains, etc.) the child consumed before quarantine and during quarantine:

**Before Quarantine**

- Never
- Once per week
- 2 to 4 days per week
- 5 to 6 days per week
- Everyday
- More than once a day

**During Quarantine**

- Never
- Once per week
- 2 to 4 days per week
- 5 to 6 days per week
- Everyday
- More than once a day

18. Due to the quarantine, the child falls asleep:

- Later
- Earlier
- Same as before the quarantine

19. Due to the quarantine, the child wakes up:

- Later
- Earlier
- Same as before the quarantine

20. How many hours (on average) the child sleeps during the night?

- Before quarantine (hours/night):
- During quarantine (hours/night):

21. Overall, how happy are you with the child's lifestyle during quarantine (this includes physical activity, sleep, food patterns, and screen time)

- Very happy
- Happy
- Neutral
- Disappointed
- Very Disappointed

22. How would you rate the mental health wellbeing of your child when comparing it between before and during quarantine?

- My child mental health was better before the quarantine
- My child mental health didn't change
- My child mental health was better after the quarantine.

23. Which of the following best describes your family behavior during the quarantine period?

- We observed social distancing to a great extent (didn't see relatives or friends)
- We observed social distancing to some extent (we only saw 1-2 other families)
- We observed social distancing to lower extent (we saw some relatives and some friends)
- We didn't observe social distancing at all (we saw everyone we used to see, we didn't change our behavior)

## Questionnaire: Arabic Version

- 1- عمر الطفل (بالسنين):
- 2- جنس الطفل:
- 3- جنسية الطفل:
  - ذكر
  - أنثى
- 4- وزن الطفل الحالي (كجم):
- 5- طول الطفل الحالي (سم):
- 6- العلاقة التي تربطك بالطفل:
  - والد
  - والد
  - مربية
  - علاقة أخرى (يرجى تحديد هذه العلاقة)
- 7- ترتيب الطفل بين أخوته:
  - الكبير
  - الأوسط
  - الصغير
- 8- عمر الذي يهتم بالطفل
  - أكثر من 20 سنة
  - بين 20 و 29 سنة
  - بين 30 و 39 سنة
  - بين 40 و 49 سنة
  - أكثر من 50 سنة
- 9- المستوى التعليمي للشخص الذي يهتم بالطفل
  - أمي
  - تعليم ابتدائي
  - تعليم متوسط
  - تعليم ثانوي
  - شهادة جامعية
  - شهادة دراسات عليا
  - شهادة دكتوراه
- 10- اختر مستوى النشاط البدني عند الطفل قبل الحجر الصحي وخلال (بما فيه اللعب، المباريات، التمارين الرياضية وأنشطة بدنية أخرى)  
قبل الحجر الصحي:
  - عالي جداً (أكثر من 7 ساعات في الأسبوع)

- عالي (بين 5 و 7 ساعات في الأسبوع)
- متوسط (بين 2 و 4 ساعات في الأسبوع)
- متدني (أقل من ساعتين في الأسبوع)
- لا شيء (0 ساعة)

#### خلال الحجر الصحي:

- عالي جداً (أكثر من 7 ساعات في الأسبوع)
- عالي (بين 5 و 7 ساعات في الأسبوع)
- متوسط (بين 2 و 4 ساعات في الأسبوع)
- متدني (أقل من ساعتين في الأسبوع)
- لا شيء (0 ساعة)

11- كمعدل متوسط، ما هو عدد ساعات النشاط البدني للطفل قبل الحجر الصحي وخلالها؟

#### قبل الحجر الصحي:

- أنشطة مدرسية خلال ساعات الدوام:
- أنشطة مدرسية بعد الدوام:
- أنشطة إضافية في البيت:

#### خلال الحجر الصحي:

- أنشطة مدرسية عبر الإنترنت:
- أنشطة ما بعد الدوام عبر الإنترنت:
- أنشطة إضافية في المنزل:

12- ما هي العوامل التي قللت من نشاط الطفل البدني خلال الحجر الصحي؟ (اختر كل ما هو ملائم)

- مساحة محدودة في المنزل
- معدات رياضية محدودة
- عدم استمتاع الطفل
- الطفل وحيداً
- إغلاق أماكن اللعب والمتنزهات
- زيادة في عدد ساعات استخدام الطفل للشاشة بهدف الدراسة (كمبيوتر وأجهزة لوحية إلكترونية)
- زيادة في عدد ساعات استخدام الطفل للشاشة بهدف اللعب والمرح (تلفزيون، كمبيوتر، ألعاب فيديو،...)
- الخوف من كوفيد-19
- عوامل أخرى – يرجى ذكرها

13- ما هي العوامل التي زادت من نشاط الطفل البدني خلال الحجر الصحي؟ (اختر كل ما هو ملائم)

- قضاء وقت أطول في المنزل
- التشجيع
- استمتاع الطفل بممارسة الأنشطة مع العائلة
- التنويع بين الأنشطة خارج وداخل المنزل
- ممارسة أنشطة جديدة في المنزل
- مكافأة الطفل بعد ممارسة أي نشاط
- تثقيف الطفل بأهمية ممارسة النشاط البدني (مناقشة الفوائد الصحية)
- تغيير برنامج الأنشطة البدنية باستمرار
- عوامل أخرى – يرجى ذكرها

14- كم ساعة خلال يوم عادي يقضي الطفل أمام الشاشة للعب والمرح (تلفزيون، فيديو، ألعاب فيديو، هاتف ذكي، جهاز لوحي)؟

• الوقت أمام الشاشة قبل الحجر الصحي (عدد الساعات في اليوم):

- 0 ساعة
- بين 0 و 1 ساعة
- بين 2 و 3 ساعات
- بين 3 و 4 ساعات
- بين 4 و 5 ساعات
- بين 5 و 6 ساعات
- بين 6 و 7 ساعات
- بين 7 و 8 ساعات
- أكثر من 8 ساعات

• الوقت أمام الشاشة خلال الحجر الصحي (عدد الساعات في اليوم):

- 0 ساعة
- بين 0 و 1 ساعة
- بين 2 و 3 ساعات
- بين 3 و 4 ساعات
- بين 4 و 5 ساعات
- بين 5 و 6 ساعات
- بين 6 و 7 ساعات
- بين 7 و 8 ساعات
- أكثر من 8 ساعات

15- كم وجبة أساسية كان يتناول الطفل قبل وخلال الحجر الصحي؟

- قبل الحجر الصحي (عدد الوجبات في اليوم):
- خلال الحجر الصحي (عدد الوجبات في اليوم):

16- اختر مقدار الأطعمة غير الصحية التي كان يتناولها الطفل قبل وخلال الحجر الصحي (الوجبات الجاهزة، المشروبات الغازية، الحلويات، ...):

قبل الحجر الصحي:

- ولا مرة
- مرة في الأسبوع
- 2 إلى 4 أيام في السبوع
- 5 إلى 6 أيام في الأسبوع
- يومياً
- أكثر من مرة في اليوم

خلال الحجر الصحي:

- ولا مرة
- مرة في الأسبوع
- 2 إلى 4 أيام في السبوع
- 5 إلى 6 أيام في الأسبوع
- يومياً
- أكثر من مرة في اليوم

17- اختر مقدار الأطعمة الصحية التي كان يتناولها الطفل قبل وخلال الحجر الصحي (الخضروات، الفواكه، الحبوب الكاملة، ...):

قبل الحجر الصحي:

- ولا مرة
- مرة في الأسبوع
- 2 إلى 4 أيام في السبوع
- 5 إلى 6 أيام في الأسبوع
- يومياً
- أكثر من مرة في اليوم

خلال الحجر الصحي:

- ولا مرة
- مرة في الأسبوع
- 2 إلى 4 أيام في السبوع
- 5 إلى 6 أيام في الأسبوع
- يومياً
- أكثر من مرة في اليوم

18- بسبب الحجر الصحي، ينام الطفل:

- أ- في وقت متأخر
- ب- باكراً
- ت- في نفس التوقيت قبل الحجر الصحي

19- بسبب الحجر الصحي، يستيقظ الطفل:

- أ- في وقت متأخر
- ب- باكراً
- ت- في نفس التوقيت قبل الحجر الصحي

20- كم ساعة (كمعدل متوسط) ينام الطفل في الليل؟

- قبل الحجر الصحي (عدد الساعات في الليل):
- خلال الحجر الصحي (عدد الساعات في الليل):

21- بشكل عام، ما مدى رضاك عن نمط الحياة الذي يتبعه طفلك خلال الحجر الصحي (بما فيه الأنشطة البدنية، ساعات النوم، الأكل، استخدام الشاشة)

- سعيد جداً
- سعيد
- محايد
- خائب الأمل
- خائب الأمل جداً

22- كيف تقيّم صحة طفلك النفسية ورفاهيته في حال قارنتها بفترة ما قبل الحجر وخلالها؟

- صحة طفلي النفسية كانت أفضل قبل الحجر الصحي
- صحة طفلي النفسية لم تتغير

- صحة طفلي النفسية أفضل بعد الحجر المنزلي

23-أي من الأمور التالية تصف تصرفات عائلتك خلال فترة الحجر الصحي؟

- طبقنا التباعد الاجتماعي إلى أقصى حدود (لم نجتمع بالأقارب والأصحاب)
- طبقنا التباعد الاجتماعي إلى حدّ ما (اجتمعنا بعائلة أو عائلتين)
- طبقنا التباعد الاجتماعي بدرجة قليلة (اجتمعنا ببعض الأقارب والأصدقاء)
- لم نطبّق التباعد الاجتماعي على الإطلاق (اجتمعنا بطل الأشخاص الذين تعودنا رؤيتهم، لم نغيّر من تصرفاتنا)
